# Supplementary material for: Lentinan administration relieves gut barrier dysfunction induced by rotavirus in a weaned piglet model
Source: Royal Society of Chemistry journal article supplement (doi:10.1039/c8fo01764f), 2019-01-01
Supplement: c8fo01764f1.pdf [file c8fo01764f1.pdf]

**Supplementary Table 1.** The composition and nutrient levels of basal diet

|                                 | Content |
|---------------------------------|---------|
| Diet composition, %             |         |
| Corn                            | 30.18   |
| Extruded corn                   | 29.00   |
| soybean meal                    | 10.76   |
| Extruded soybean                | 10.00   |
| wheat bran                      | 2.00    |
| Soybean protein concentrate     | 5.00    |
| Corn starch                     | 0.50    |
| Whey powder                     | 4.00    |
| Fish meal                       | 4.00    |
| CaHPO <sub>4</sub>              | 0.55    |
| CaCO <sub>3</sub>               | 0.70    |
| NaCl                            | 0.30    |
| Soybean meal                    | 1.78    |
| L-Lysine • HCl                  | 0.33    |
| DL-Methionine                   | 0.09    |
| L-Threonine                     | 0.15    |
| L-Tryptophan                    | 0.03    |
| Choline chloride                | 0.10    |
| Vitamin premix <sup>a</sup>     | 0.03    |
| Mineral premix <sup>b</sup>     | 0.50    |
| Total                           | 100.00  |
| Nutrient levels, % <sup>c</sup> |         |
| Digestible energy, MJ/kg        | 14.83   |
| Crude protein                   | 20.56   |

|                               |      |
|-------------------------------|------|
| Calcium                       | 0.80 |
| Available phosphorus          | 0.40 |
| Total lysine                  | 1.35 |
| Total methionine and cysteine | 0.74 |
| Total threonine               | 0.79 |
| Total tryptophan              | 0.22 |

---

<sup>a</sup> Provided the following per kg of diet: Vitamin A, 8000 IU; Vitamin D<sub>3</sub>, 1500 IU; Vitamin E, 25 IU; Vitamin K<sub>3</sub>, 2.0 mg; Vitamin B<sub>1</sub>, 2.0 mg; Vitamin B<sub>2</sub>, 5.0 mg; Vitamin B<sub>6</sub>, 4.0 mg; Vitamin B<sub>12</sub>, 0.1 mg; Niacin, 25 mg; Pantothenic, 12 mg; Folic acid, 0.75 mg; Biotin, 0.2 mg.

<sup>b</sup> Provided the following per kg of diet: Fe, 100 mg; Cu, 6 mg; Mn, 4 mg; Zn, 100 mg; I, 0.14 mg; Se, 0.35 mg.

<sup>c</sup> Nutrient levels were calculated values.
